# Supplementary material
Source: publisher figshare collection journal article supplement (https://gsajournals.figshare.com/ndownloader/files/24280496)
Supplement: Supplementary file 1 [file 24280496]

## Sheet: Q values K=6
File S3 Co-ancestry coefficient matrix of 304 Ethiopian sorghum accessions based on ADMIXTURE analysis at K = 6
Accession_ID	Cluster1	Cluster2	Cluster3	Cluster4	Cluster5	Cluster6	Subgroup in Figure 1B
Plate10_A9	0.741163	1e-05	1e-05	0.084645	0.137945	0.036226	1
Plate10_B1	0.99995	1e-05	1e-05	1e-05	1e-05	1e-05	1
Plate10_B10	0.639393	0.015281	1e-05	0.28544	0.059866	1e-05	1
Plate10_B11	0.988751	1.3e-05	0.011205	1e-05	1e-05	1e-05	1
Plate10_B2	0.955258	1e-05	0.044702	1e-05	1e-05	1e-05	1
Plate10_B4	0.976852	1.8e-05	0.012007	0.011104	1e-05	1e-05	1
Plate10_B5	0.888761	1.1e-05	0.111198	1e-05	1e-05	1e-05	1
Plate10_B6	0.716647	1e-05	1e-05	0.283313	1e-05	1e-05	1
Plate10_B7	0.99995	1e-05	1e-05	1e-05	1e-05	1e-05	1
Plate10_B8	0.510016	1e-05	0.030926	0.222454	0.236585	1e-05	1
Plate10_C1	0.881402	1e-05	1e-05	0.118558	1e-05	1e-05	1
Plate10_C12	0.486009	0.015578	0.091172	0.197231	0.210001	1e-05	1
Plate10_C2	0.99995	1e-05	1e-05	1e-05	1e-05	1e-05	1
Plate10_C7	0.99995	1e-05	1e-05	1e-05	1e-05	1e-05	1
Plate10_D10	0.585517	0.009211	0.069409	1e-05	0.335843	1e-05	1
Plate10_D12	0.660441	0.011302	0.012296	0.259375	0.056576	1e-05	1
Plate10_D3	0.929725	1e-05	0.031597	0.038649	1e-05	1e-05	1
Plate10_D7	0.498169	0.020599	1e-05	1e-05	0.481202	1e-05	1
Plate10_E11	0.908215	1e-05	0.091745	1e-05	1e-05	1e-05	1
Plate10_E3	0.929334	1e-05	0.022531	0.048105	1e-05	1e-05	1
Plate10_E5	0.671024	0.011506	1e-05	0.270393	0.047056	1e-05	1
Plate10_F2	0.523468	0.007896	1e-05	0.143487	0.206773	0.118365	1
Plate10_F6	0.936946	1e-05	0.06301	1e-05	1.3e-05	1e-05	1
Plate10_F9	0.853456	1e-05	1e-05	0.130081	0.003414	0.013029	1
Plate10_G10	0.443768	0.008675	1e-05	0.2828	0.188911	0.075837	1
Plate10_G11	0.999797	1e-05	0.000159	1e-05	1.4e-05	1e-05	1
Plate10_G3	0.99995	1e-05	1e-05	1e-05	1e-05	1e-05	1
Plate10_G9	0.957851	1e-05	0.031873	0.010246	1e-05	1e-05	1
Plate10_H1	0.99995	1e-05	1e-05	1e-05	1e-05	1e-05	1
Plate10_H11	0.99995	1e-05	1e-05	1e-05	1e-05	1e-05	1
Plate10_H12	0.99995	1e-05	1e-05	1e-05	1e-05	1e-05	1
Plate10_H2	0.99995	1e-05	1e-05	1e-05	1e-05	1e-05	1
Plate10_H5	0.62376	0.015035	0.034705	0.275255	0.051236	1e-05	1
Plate10_H8	0.81076	2e-05	0.18919	1e-05	1e-05	1e-05	1
Plate11_A1	0.364186	0.015726	0.348192	0.209359	0.051831	0.010705	1
Plate11_D1	0.84222	1e-05	0.114364	0.043386	1e-05	1e-05	1
Plate8_A11	0.885647	1e-05	0.114313	1e-05	1e-05	1e-05	1
Plate8_A12	0.907327	1e-05	0.092623	1.7e-05	1.2e-05	1e-05	1
Plate8_A2	0.814267	1.3e-05	0.18569	1e-05	1e-05	1e-05	1
Plate8_B3	0.830222	1e-05	0.169738	1e-05	1e-05	1e-05	1
Plate8_C10	0.80364	1e-05	0.19632	1e-05	1e-05	1e-05	1
Plate8_C8	0.348338	0.098996	0.035655	0.065685	0.116057	0.33527	1
Plate8_D11	0.881961	1e-05	0.117991	1.5e-05	1.3e-05	1e-05	1
Plate8_D12	0.405693	1e-05	0.130371	0.367567	0.035669	0.060689	1
Plate8_D5	0.876947	1e-05	0.123013	1e-05	1e-05	1e-05	1
Plate8_D7	0.821677	1.2e-05	0.17828	1e-05	1e-05	1e-05	1
Plate8_E10	0.822026	1e-05	0.177926	1.8e-05	1e-05	1e-05	1
Plate8_E12	0.383789	0.120719	0.045327	0.171879	0.269749	0.008536	1
Plate8_E5	0.832978	1e-05	0.166982	1e-05	1e-05	1e-05	1
Plate8_F5	0.913311	1e-05	0.086649	1e-05	1e-05	1e-05	1
Plate8_G2	0.9124	1e-05	0.08756	1e-05	1e-05	1e-05	1
Plate8_H4	0.916889	1e-05	0.083071	1e-05	1e-05	1e-05	1
Plate9_A12	0.692986	0.132499	1e-05	0.026354	0.148141	1e-05	1
Plate9_A4	0.99995	1e-05	1e-05	1e-05	1e-05	1e-05	1
Plate9_A5	0.55047	0.021139	0.085588	0.342783	1e-05	1e-05	1
Plate9_A8	0.81355	1e-05	0.048675	0.137745	1e-05	1e-05	1
Plate9_B11	0.649284	0.005875	0.018221	0.320298	1e-05	0.006312	1
Plate9_B4	0.994231	1.1e-05	0.005728	1e-05	1e-05	1e-05	1
Plate9_B5	0.73218	1e-05	0.226763	0.041027	1e-05	1e-05	1
Plate9_B9	0.798565	1e-05	0.044994	0.156412	1e-05	1e-05	1
Plate9_C10	0.948235	1e-05	0.051725	1e-05	1e-05	1e-05	1
Plate9_C11	0.984213	1e-05	0.015747	1e-05	1e-05	1e-05	1
Plate9_C7	0.984797	1e-05	0.015163	1e-05	1e-05	1e-05	1
Plate9_C9	0.442582	1e-05	1e-05	0.437741	0.048096	0.071561	1
Plate9_D12	0.964831	1e-05	0.035129	1e-05	1e-05	1e-05	1
Plate9_D2	0.957271	1e-05	0.042689	1e-05	1e-05	1e-05	1
Plate9_D8	0.919192	1.5e-05	0.080763	1e-05	1e-05	1e-05	1
Plate9_D9	0.442962	1e-05	1e-05	0.199314	0.273095	0.084609	1
Plate9_E11	0.920354	1e-05	0.079606	1e-05	1e-05	1e-05	1
Plate9_E4	0.898913	1e-05	0.066657	0.0344	1e-05	1e-05	1
Plate9_E5	0.940263	0.021837	0.018346	0.019534	1e-05	1e-05	1
Plate9_E6	0.504733	1e-05	0.011958	0.422616	1e-05	0.060673	1
Plate9_E7	0.99995	1e-05	1e-05	1e-05	1e-05	1e-05	1
Plate9_F10	0.99995	1e-05	1e-05	1e-05	1e-05	1e-05	1
Plate9_F5	0.993242	1.2e-05	0.006717	1e-05	1e-05	1e-05	1
Plate9_F6	0.989226	1e-05	0.010734	1e-05	1e-05	1e-05	1
Plate9_F8	0.953311	1e-05	0.043108	0.003551	1e-05	1e-05	1
Plate9_G1	0.886931	1e-05	0.113029	1e-05	1e-05	1e-05	1
Plate9_G10	0.910359	1e-05	0.065286	0.024324	1e-05	1e-05	1
Plate9_G11	0.99995	1e-05	1e-05	1e-05	1e-05	1e-05	1
Plate9_G7	0.845859	1e-05	0.028093	0.126018	1e-05	1e-05	1
Plate9_H3	0.98826	1e-05	0.0117	1e-05	1e-05	1e-05	1
Plate9_H4	0.98656	1e-05	0.0134	1e-05	1e-05	1e-05	1
Plate9_H8	0.876758	1e-05	0.08873	0.034482	1e-05	1e-05	1
Plate10_A7	1e-05	0.99995	1e-05	1e-05	1e-05	1e-05	2
Plate10_C6	1e-05	0.999942	1e-05	1e-05	1.8e-05	1e-05	2
Plate10_D1	1e-05	0.99995	1e-05	1e-05	1e-05	1e-05	2
Plate8_A8	1e-05	0.607418	0.036874	0.049953	0.305734	1e-05	2
Plate8_B1	1e-05	0.99995	1e-05	1e-05	1e-05	1e-05	2
Plate8_B2	1e-05	0.881519	0.064919	0.031389	0.022152	1e-05	2
Plate8_B5	1e-05	0.720582	0.279378	1e-05	1e-05	1e-05	2
Plate8_B6	1e-05	0.91962	0.003452	1e-05	1e-05	0.076898	2
Plate8_B8	0.04825	0.775377	0.013936	0.162417	1e-05	1e-05	2
Plate8_C12	1e-05	0.99995	1e-05	1e-05	1e-05	1e-05	2
Plate8_C3	1e-05	0.932347	0.067613	1e-05	1e-05	1e-05	2
Plate8_C6	1.2e-05	0.872313	0.095551	1e-05	0.032104	1e-05	2
Plate8_D10	0.021399	0.494592	0.261932	1e-05	1e-05	0.222056	2
Plate8_D6	1e-05	0.99995	1e-05	1e-05	1e-05	1e-05	2
Plate8_E1	1e-05	0.762274	0.019207	1e-05	1e-05	0.218489	2
Plate8_E11	0.003504	0.788413	0.110216	1e-05	0.053984	0.043873	2
Plate8_E2	1e-05	0.99995	1e-05	1e-05	1e-05	1e-05	2
Plate8_E4	1e-05	0.630999	0.049677	1.3e-05	1e-05	0.319291	2
Plate8_E8	1e-05	0.976139	0.023812	1e-05	2e-05	1e-05	2
Plate8_F10	1e-05	0.99995	1e-05	1e-05	1e-05	1e-05	2
Plate8_F6	1e-05	0.645983	0.021009	1e-05	1e-05	0.332978	2
Plate8_G1	1e-05	0.853751	0.044294	1e-05	0.101925	1e-05	2
Plate8_G11	0.309401	0.370224	0.006386	0.050134	0.123606	0.140249	2
Plate8_G12	1e-05	0.999948	1.2e-05	1e-05	1e-05	1e-05	2
Plate8_G6	1e-05	0.999946	1.4e-05	1e-05	1e-05	1e-05	2
Plate8_H11	1e-05	0.999949	1e-05	1e-05	1.1e-05	1e-05	2
Plate8_H12	1e-05	0.999949	1.1e-05	1e-05	1e-05	1e-05	2
Plate8_H3	2e-05	0.99994	1e-05	1e-05	1e-05	1e-05	2
Plate8_H6	1e-05	0.999936	1.9e-05	1.3e-05	1.3e-05	1e-05	2
Plate8_H7	1e-05	0.656587	0.343373	1e-05	1e-05	1e-05	2
Plate9_A1	1e-05	0.99995	1e-05	1e-05	1e-05	1e-05	2
Plate9_A2	1e-05	0.743491	0.033031	1e-05	0.223448	1e-05	2
Plate9_B1	1e-05	0.99995	1e-05	1e-05	1e-05	1e-05	2
Plate9_B3	1e-05	0.99995	1e-05	1e-05	1e-05	1e-05	2
Plate9_C1	1e-05	0.99995	1e-05	1e-05	1e-05	1e-05	2
Plate9_D5	1e-05	0.99995	1e-05	1e-05	1e-05	1e-05	2
Plate9_E12	1.3e-05	0.999947	1e-05	1e-05	1e-05	1e-05	2
Plate9_E3	1.3e-05	0.999933	1.4e-05	1e-05	1.9e-05	1e-05	2
Plate9_F2	1e-05	0.96603	1.1e-05	1e-05	1e-05	0.033929	2
Plate9_G2	1e-05	0.99995	1e-05	1e-05	1e-05	1e-05	2
Plate9_H1	1e-05	0.999949	1e-05	1e-05	1.1e-05	1e-05	2
Plate10_A5	0.420683	1e-05	0.508843	0.064009	1e-05	0.006445	3
Plate10_B9	1e-05	1.3e-05	0.999947	1e-05	1e-05	1e-05	3
Plate10_C11	1e-05	1e-05	0.99995	1e-05	1e-05	1e-05	3
Plate10_C4	1e-05	1e-05	0.99995	1e-05	1e-05	1e-05	3
Plate11_A2	0.153429	0.015735	0.756976	1e-05	0.07384	1e-05	3
Plate11_B2	1e-05	1.4e-05	0.999936	1.5e-05	1.4e-05	1e-05	3
Plate11_C2	1e-05	1e-05	0.99995	1e-05	1e-05	1e-05	3
Plate11_D2	0.156674	1e-05	0.705126	0.138171	1e-05	1e-05	3
Plate11_E2	1e-05	1e-05	0.99995	1e-05	1e-05	1e-05	3
Plate11_F2	1e-05	1.7e-05	0.999943	1e-05	1e-05	1e-05	3
Plate11_G2	1e-05	1e-05	0.99995	1e-05	1e-05	1e-05	3
Plate11_H1	1e-05	0.036586	0.886671	1e-05	0.076713	1e-05	3
Plate11_H2	1e-05	1.1e-05	0.999943	1.6e-05	1.1e-05	1e-05	3
Plate8_A1	1e-05	1e-05	0.99995	1e-05	1e-05	1e-05	3
Plate8_A5	0.141531	1e-05	0.647461	1e-05	1e-05	0.210978	3
Plate8_A9	1e-05	0.483642	0.516318	1e-05	1e-05	1e-05	3
Plate8_B9	1e-05	0.348626	0.651334	1e-05	1e-05	1e-05	3
Plate8_C9	1e-05	1e-05	0.936369	1e-05	1e-05	0.063591	3
Plate8_D1	1e-05	0.446309	0.553651	1e-05	1e-05	1e-05	3
Plate8_D3	1e-05	0.163664	0.452643	0.021843	0.276714	0.085125	3
Plate8_D9	1e-05	1e-05	0.99995	1e-05	1e-05	1e-05	3
Plate8_E3	0.080096	0.00847	0.424588	0.074275	0.179101	0.23347	3
Plate8_E7	1e-05	1e-05	0.99995	1e-05	1e-05	1e-05	3
Plate8_E9	1e-05	0.482044	0.517916	1e-05	1e-05	1e-05	3
Plate8_F1	0.12943	1e-05	0.438917	1.2e-05	1e-05	0.431621	3
Plate8_G5	0.142473	0.015247	0.440014	0.402246	1e-05	1e-05	3
Plate8_H9	0.212287	1e-05	0.735504	0.052179	1e-05	1e-05	3
Plate9_C5	1.2e-05	1e-05	0.917431	1e-05	0.082526	1e-05	3
Plate9_E1	1e-05	1.7e-05	0.999943	1e-05	1e-05	1e-05	3
Plate9_E8	1e-05	1e-05	0.99995	1e-05	1e-05	1e-05	3
Plate9_H10	1e-05	1e-05	0.99995	1e-05	1e-05	1e-05	3
Plate9_H11	1e-05	1e-05	0.99995	1e-05	1e-05	1e-05	3
Plate9_H5	1e-05	1e-05	0.99995	1e-05	1e-05	1e-05	3
Plate10_A11	1e-05	1e-05	0.053078	0.946882	1e-05	1e-05	4
Plate10_A12	1e-05	0.132961	0.136652	0.401291	0.311711	0.017375	4
Plate10_A2	1.9e-05	1e-05	0.009167	0.990784	1e-05	1e-05	4
Plate10_A3	1e-05	1e-05	0.023879	0.964373	0.011718	1e-05	4
Plate10_A6	0.026773	0.015668	1e-05	0.89143	0.031468	0.034652	4
Plate10_B3	0.030372	1e-05	1e-05	0.969588	1e-05	1e-05	4
Plate10_C3	0.393713	1e-05	0.012555	0.593701	1e-05	1e-05	4
Plate10_C9	1e-05	1e-05	1e-05	0.718727	1e-05	0.281233	4
Plate10_D11	1e-05	1e-05	0.32245	0.67751	1e-05	1e-05	4
Plate10_D8	1e-05	1e-05	1e-05	0.887394	1e-05	0.112566	4
Plate10_D9	0.096753	0.011939	0.0377	0.601491	0.123277	0.128839	4
Plate10_E12	0.036916	1e-05	1e-05	0.963044	1e-05	1e-05	4
Plate10_E4	1e-05	1e-05	0.023347	0.976613	1e-05	1e-05	4
Plate10_E6	0.112481	0.094312	1e-05	0.508016	0.284929	0.000252	4
Plate10_E7	1e-05	1e-05	1e-05	0.99995	1e-05	1e-05	4
Plate10_E8	1e-05	1e-05	0.003542	0.996418	1e-05	1e-05	4
Plate10_E9	1e-05	1.9e-05	0.070205	0.645276	0.28448	1e-05	4
Plate10_F1	1e-05	1e-05	1e-05	0.99995	1e-05	1e-05	4
Plate10_F12	0.092662	0.012805	0.031026	0.486422	0.303577	0.073508	4
Plate10_F4	0.323225	0.001253	1e-05	0.606166	0.069336	1e-05	4
Plate10_G12	1e-05	1e-05	0.266562	0.733398	1e-05	1e-05	4
Plate10_G2	0.021638	1e-05	0.037883	0.940449	1e-05	1e-05	4
Plate10_G6	0.030674	1e-05	0.031329	0.937967	1e-05	1e-05	4
Plate10_G7	1e-05	1e-05	1e-05	0.99995	1e-05	1e-05	4
Plate10_G8	1e-05	1e-05	0.00934	0.99062	1e-05	1e-05	4
Plate10_H4	1e-05	1e-05	1e-05	0.99995	1e-05	1e-05	4
Plate10_H6	0.094755	0.00184	0.108688	0.794697	1e-05	1e-05	4
Plate10_H9	0.030118	1e-05	0.047479	0.922373	1e-05	1e-05	4
Plate11_B1	0.124465	0.002629	0.083399	0.445347	0.137128	0.207033	4
Plate11_E1	1e-05	1e-05	0.062295	0.937665	1e-05	1e-05	4
Plate11_F1	1e-05	1e-05	0.415388	0.584572	1e-05	1e-05	4
Plate11_G1	1e-05	1e-05	1e-05	0.99995	1e-05	1e-05	4
Plate8_A10	0.215103	0.009144	0.121862	0.646019	0.007863	1e-05	4
Plate8_A4	0.074828	0.014681	0.154347	0.535833	0.034484	0.185828	4
Plate8_A7	1e-05	1e-05	0.115923	0.884037	1e-05	1e-05	4
Plate8_B4	0.205483	1e-05	0.27169	0.522797	1e-05	1e-05	4
Plate8_B7	0.241415	0.014894	0.088175	0.63131	0.024197	1e-05	4
Plate8_C1	0.239548	1e-05	0.243159	0.517263	1e-05	1e-05	4
Plate8_C2	0.040252	1e-05	0.057021	0.902697	1e-05	1e-05	4
Plate8_C7	1e-05	1e-05	0.3749	0.62506	1e-05	1e-05	4
Plate8_D2	1.5e-05	1e-05	0.151799	0.848155	1e-05	1e-05	4
Plate8_E6	0.352032	0.00815	0.206728	0.43307	1e-05	1e-05	4
Plate8_F11	0.24403	0.023202	0.11476	0.559799	0.011302	0.046907	4
Plate8_F12	1e-05	1.7e-05	0.116596	0.883358	1e-05	1e-05	4
Plate8_F2	0.074355	1e-05	0.165996	0.580729	0.019603	0.159307	4
Plate8_F8	0.227064	1e-05	0.24658	0.526326	1e-05	1e-05	4
Plate8_F9	1e-05	1e-05	0.102185	0.897775	1e-05	1e-05	4
Plate8_G10	0.223	1e-05	0.143032	0.602532	1e-05	0.031416	4
Plate8_G4	1e-05	1e-05	0.085646	0.914314	1e-05	1e-05	4
Plate8_G7	1e-05	1e-05	0.128824	0.871136	1e-05	1e-05	4
Plate8_H2	0.012398	1e-05	0.146599	0.840973	1e-05	1e-05	4
Plate9_A10	0.278702	0.075517	1e-05	0.49262	0.093368	0.059784	4
Plate9_A7	1e-05	1e-05	0.026273	0.973687	1e-05	1e-05	4
Plate9_A9	0.002509	1e-05	0.000216	0.774708	0.039206	0.183352	4
Plate9_B10	0.008994	1.2e-05	0.013458	0.977516	1e-05	1e-05	4
Plate9_B12	1e-05	1e-05	1e-05	0.99995	1e-05	1e-05	4
Plate9_B2	1e-05	1e-05	0.036131	0.963829	1e-05	1e-05	4
Plate9_B6	1e-05	1e-05	1e-05	0.99995	1e-05	1e-05	4
Plate9_B7	0.033106	1e-05	0.018724	0.94814	1e-05	1e-05	4
Plate9_C12	0.333384	0.019536	0.022963	0.49131	0.11197	0.020836	4
Plate9_C8	0.141738	1e-05	1e-05	0.631267	0.032016	0.194959	4
Plate9_D1	1e-05	1e-05	0.060686	0.939274	1e-05	1e-05	4
Plate9_D10	1e-05	1.9e-05	0.079416	0.920535	1e-05	1e-05	4
Plate9_D11	0.280682	0.021464	0.011726	0.447874	0.204181	0.034071	4
Plate9_D3	0.301934	0.026417	1e-05	0.342479	0.104701	0.224459	4
Plate9_E10	0.030619	1.3e-05	0.058798	0.91055	1e-05	1e-05	4
Plate9_E9	1e-05	1e-05	0.075206	0.924754	1e-05	1e-05	4
Plate9_F12	0.057826	1e-05	0.068159	0.873985	1e-05	1e-05	4
Plate9_F3	0.292021	0.010023	0.142533	0.5554	1.2e-05	1e-05	4
Plate9_F4	1e-05	1e-05	1e-05	0.888309	1e-05	0.111651	4
Plate9_F7	1e-05	0.038624	0.021751	0.60464	0.334965	1e-05	4
Plate9_F9	1e-05	1e-05	1e-05	0.99995	1e-05	1e-05	4
Plate9_G12	0.047884	1e-05	0.069609	0.882477	1e-05	1e-05	4
Plate9_G3	0.284638	1e-05	0.090666	0.624665	1e-05	1e-05	4
Plate9_G5	0.282622	1e-05	0.218824	0.498524	1e-05	1e-05	4
Plate9_G6	0.180906	1e-05	0.01519	0.803875	1e-05	1e-05	4
Plate9_G8	1.9e-05	1e-05	0.103221	0.89673	1.1e-05	1e-05	4
Plate9_H12	1e-05	1e-05	0.016066	0.983894	1e-05	1e-05	4
Plate9_H7	0.163943	1e-05	1e-05	0.437952	0.167136	0.230949	4
Plate9_H9	1e-05	1e-05	0.051079	0.948881	1e-05	1e-05	4
Plate10_A1	1e-05	1e-05	1e-05	1e-05	0.99995	1e-05	5
Plate10_A10	0.122733	1e-05	1e-05	0.118342	0.39847	0.360434	5
Plate10_A4	1e-05	1e-05	1e-05	1e-05	0.99995	1e-05	5
Plate10_A8	0.255383	0.060618	0.035657	0.271133	0.341118	0.03609	5
Plate10_B12	0.091892	0.153446	1e-05	0.21201	0.363304	0.179338	5
Plate10_C5	1e-05	0.030945	1e-05	1e-05	0.969015	1e-05	5
Plate10_C8	0.029746	1e-05	1e-05	0.37537	0.464676	0.130188	5
Plate10_D2	0.258356	0.039297	0.018544	0.237136	0.407309	0.039357	5
Plate10_D4	0.117112	0.012398	1e-05	0.235478	0.634993	1e-05	5
Plate10_D5	0.326027	0.029767	1e-05	0.173954	0.334316	0.135925	5
Plate10_E1	0.470496	1e-05	1e-05	0.040188	0.489286	1e-05	5
Plate10_E10	0.072667	0.248404	0.014586	0.070932	0.571531	0.02188	5
Plate10_E2	1e-05	1e-05	0.037154	1e-05	0.962806	1e-05	5
Plate10_F3	1e-05	1e-05	1e-05	1e-05	0.99995	1e-05	5
Plate10_F5	0.356382	1e-05	1e-05	0.24045	0.393842	0.009306	5
Plate10_F7	0.203044	0.045688	1e-05	0.201633	0.426046	0.123579	5
Plate10_F8	1e-05	1e-05	1e-05	1e-05	0.99995	1e-05	5
Plate10_G4	1.9e-05	1e-05	1e-05	1e-05	0.999941	1e-05	5
Plate10_G5	0.043502	0.042406	0.196279	0.127584	0.513094	0.077135	5
Plate10_H10	0.17246	1e-05	0.048761	0.35275	0.401844	0.024176	5
Plate10_H3	1e-05	1e-05	0.028203	1e-05	0.971757	1e-05	5
Plate10_H7	1e-05	1e-05	0.032117	1e-05	0.967843	1e-05	5
Plate11_C1	1e-05	0.20071	0.267529	0.102156	0.424154	0.005441	5
Plate8_C11	1e-05	0.180134	0.125771	0.021089	0.672986	1e-05	5
Plate8_D4	0.098229	1.9e-05	0.097136	1e-05	0.451651	0.352956	5
Plate8_F3	0.121235	0.111075	0.111294	0.042076	0.454957	0.159363	5
Plate8_F4	1e-05	0.260676	0.013793	0.155311	0.5702	1e-05	5
Plate9_A11	0.439822	1e-05	1e-05	1e-05	0.560138	1e-05	5
Plate9_A6	0.001442	1e-05	0.014646	1e-05	0.983882	1e-05	5
Plate9_B8	1e-05	1e-05	1e-05	1e-05	0.99995	1e-05	5
Plate9_C4	0.070984	0.056021	1e-05	0.288774	0.31517	0.269041	5
Plate9_D4	0.003285	0.087341	0.000829	0.115309	0.680192	0.113044	5
Plate9_D6	1e-05	1e-05	1e-05	1e-05	0.99995	1e-05	5
Plate9_F11	1.5e-05	1e-05	1.3e-05	1e-05	0.999942	1e-05	5
Plate9_G4	0.022719	0.054952	0.015647	0.162124	0.515774	0.228784	5
Plate9_G9	1e-05	1e-05	1e-05	1e-05	0.99995	1e-05	5
Plate9_H6	1e-05	0.053661	0.028142	1.8e-05	0.918159	1e-05	5
Plate10_C10	0.246211	0.011487	0.08279	0.211041	0.004175	0.444296	6
Plate10_D6	1.7e-05	1e-05	1e-05	1e-05	0.010711	0.989242	6
Plate10_F10	0.059176	0.032297	1e-05	0.099872	0.086999	0.721645	6
Plate10_F11	0.036086	1e-05	1e-05	0.116207	0.227996	0.619691	6
Plate10_G1	1e-05	1e-05	1e-05	1e-05	0.424388	0.575572	6
Plate8_A3	1e-05	1e-05	1.4e-05	1e-05	1e-05	0.999946	6
Plate8_A6	1e-05	1e-05	1e-05	1e-05	1e-05	0.99995	6
Plate8_B10	1e-05	0.00146	0.017194	0.01512	0.221363	0.744852	6
Plate8_B11	1e-05	1e-05	1e-05	1e-05	1e-05	0.99995	6
Plate8_B12	1e-05	1e-05	1e-05	1e-05	1e-05	0.99995	6
Plate8_C4	1e-05	1e-05	0.424892	1e-05	1e-05	0.575068	6
Plate8_C5	1e-05	1e-05	1e-05	1e-05	1e-05	0.99995	6
Plate8_D8	0.15442	1e-05	0.225385	1e-05	1e-05	0.620165	6
Plate8_F7	0.148299	1.2e-05	0.090238	1e-05	1e-05	0.76143	6
Plate8_G3	0.11363	0.027512	0.140839	0.126576	0.044204	0.547239	6
Plate8_G8	1e-05	1e-05	0.019104	1e-05	1e-05	0.980856	6
Plate8_G9	1e-05	1e-05	0.408898	1e-05	1e-05	0.591062	6
Plate8_H1	0.196544	0.238084	1e-05	0.238644	1e-05	0.326708	6
Plate8_H10	0.087958	1e-05	0.044518	1e-05	1e-05	0.867493	6
Plate8_H5	1e-05	1e-05	1.3e-05	1e-05	1e-05	0.999947	6
Plate8_H8	0.223111	1e-05	0.144343	0.101877	1e-05	0.53065	6
Plate9_A3	0.228139	0.069803	1e-05	1.8e-05	1e-05	0.702019	6
Plate9_C2	1.6e-05	1e-05	0.038726	1e-05	1e-05	0.961228	6
Plate9_C3	1e-05	1.4e-05	2e-05	1e-05	1e-05	0.999936	6
Plate9_C6	1e-05	1e-05	1.9e-05	1e-05	1e-05	0.999941	6
Plate9_D7	0.179064	0.020587	1e-05	0.221512	0.203146	0.375681	6
Plate9_E2	0.008301	1e-05	0.111865	1e-05	1e-05	0.879803	6
Plate9_F1	0.34193	1e-05	1e-05	0.000423	0.014006	0.64362	6
Plate9_H2	0.030722	0.071876	0.013609	1e-05	1e-05	0.883774	6
